# Supplementary material
Source: PubMed Central journal article supplement (PMC7033005)
Supplement: NIHMS1541777-supplement-Supp_1.pdf [file NIHMS1541777-supplement-Supp_1.pdf]

# Diet items in the Hawaii Personality and Health Cohort: Analysis Code and Results

---

```
rm(list=ls())
knitr::opts_chunk$set(echo = TRUE)
options(width=120)
```

## 1 Data preparation

### 1.1 Load data and packages

We load necessary packages into our workspace.

```
library(knitr)
library(haven)
library(foreign)
library(lsr)
library(psych)
library(stargazer)
library(sjPlot)
```

We then load the data files, which are saved as SPSS data files. Both the `haven` ([Wickham Miller, 2019](#)) and `foreign` ([R Core Team, 2018](#)) packages are used to load these data files.

```
demographics <- read_sav("../data/ORI Data/demograph2016.sav")
age <- read_sav("../data/ORI Data/cog_function_c1c2.sav")
Q5_personality <- read.spss("../data/ORI Data/Original Q5_NEO.sav",
                             use.value.labels = F, to.data.frame = T)
Q1_diet <- read.spss("../data/ORI Data/Q1.sav",
                    use.value.labels = F, to.data.frame = T)
Q7_health <- read_sav("../data/ORI Data/Q7_labels2.sav")
child_clinic <- read_sav("../data/ORI Data/childc1q1.sav")
```

### 1.2 Prepare variables of interest

We create new variables in these data sets. In Q7, for the variable of self-rated health we simply change the name of the variable. For Type 2 Diabetes, we recode the binary variable from 1 (Yes) and 2 (No) to 1 and 0, respectively. We also extract age at onset of Type 2 diabetes.

```
Q7_health$SelfRatedHealth <- Q7_health$q7srhlth
Q7_health$Type2Diabetes <- ifelse(Q7_health$q7diab3 == 1, 1, 0)
```

In the childhood personality and clinic data, we rename the clinic assessment of BMI.

```
child_clinic$BMI <- child_clinic$c1bmi
```

In the Q1 diet questionnaire, we set all the variable names to lower-case, to make the code easier to create and to read.

```
colnames(Q1_diet) <- tolower(colnames(Q1_diet))
```

### 1.3 Identify diet items

We then create a vector of the names of the diet items of interest. These items are named q1sea23, q1sea24, ..., q1sea46.

```
diet.items <- paste("q1sea",23:46, sep="")
```

We identify the location of these items in the Q1 data frame. We then extract the item text of those variables from the variable labels attribute of the data frame, which has been imported from the SPSS file.

```
loc.diet <- which(colnames(Q1_diet) %in% diet.items)
diet.labels <- attr(Q1_diet, "variable.labels")[loc.diet]
```

### 1.4 Merge data frames

We create our data set of interest by merging the data frames together by the ID numbers of participants. From the diet questionnaire, we only merge the diet items we have identified. From the child and clinic data, we only merge the BMI variable. We then remove the original data frames from our workspace.

```
ori.diet <- merge(demographics, Q5_personality, by.x="pchid", by.y="PCHID", all.x=T, all.y=T)
ori.diet <- merge(ori.diet, Q7_health, by="pchid", all.x=T, all.y=T)
ori.diet <- merge(ori.diet, Q1_diet[,c("pchid", diet.items)], by="pchid", all.x=T, all.y=T)
ori.diet <- merge(ori.diet, subset(child_clinic, select=c(pchid, BMI)),
                 by="pchid", all.x=T, all.y=T)
ori.diet <- merge(ori.diet, subset(age, select=c(pchid, age)), all.x=T)

colnames(ori.diet)[colnames(ori.diet) == "age"] = "age_clinic"

rm(list=c("demographics", "Q5_personality", "Q7_health", "child_clinic", "Q1_diet", "age"))
```

### 1.5 Create personality scores

Personality items were scored using the `make.keys` and `scoreItems` functions in the `psych` package (Revelle, 2019).

```
personality.list <- list(
  Extra = c("PQ2", "PQ32", "-PQ62", "-PQ92",
            "PQ7", "PQ37", "-PQ67", "-PQ97",
            "PQ12", "PQ42", "PQ72", "-PQ102",
            "PQ17", "PQ47", "PQ77", "-PQ107",
            "PQ22", "PQ52", "PQ82", "PQ112",
            "PQ27", "PQ57", "PQ87", "PQ117"),
  Agree = c("PQ4", "PQ34", "PQ64", "-PQ94",
            "-PQ9", "-PQ39", "-PQ69", "-PQ99",
            "PQ14", "PQ44", "-PQ74", "-PQ104",
            "-PQ19", "-PQ49", "-PQ79", "-PQ109",
```

```

      "-PQ24", "-PQ54", "-PQ84", "-PQ114",
      "PQ29", "PQ59", "-PQ89", "-PQ119"),
Con = c("PQ5", "PQ35", "PQ65", "PQ95",
      "PQ10", "-PQ40", "-PQ70", "-PQ100",
      "PQ15", "PQ45", "-PQ75", "-PQ105",
      "PQ20", "PQ50", "-PQ80", "-PQ110",
      "PQ25", "PQ55", "-PQ85", "-PQ115",
      "-PQ30", "-PQ60", "-PQ90", "-PQ120"),
Neur = c("PQ1", "PQ31", "PQ61", "PQ91",
      "PQ6", "PQ36", "PQ66", "-PQ96",
      "PQ11", "PQ41", "PQ71", "-PQ101",
      "PQ16", "PQ46", "PQ76", "-PQ106",
      "PQ21", "-PQ51", "-PQ81", "-PQ111",
      "PQ26", "PQ56", "PQ86", "-PQ116"),
Open = c("PQ3", "PQ33", "PQ63", "PQ93",
      "PQ8", "PQ38", "-PQ68", "-PQ98",
      "PQ13", "PQ43", "-PQ73", "-PQ103",
      "PQ18", "-PQ48", "-PQ78", "-PQ108",
      "PQ23", "-PQ53", "-PQ83", "-PQ113",
      "PQ28", "PQ58", "-PQ88", "-PQ118"))

personality.keys <- make.keys(
  nvars=120,
  keys.list = personality.list,
  item.labels = colnames(ori.diet)[grepl("^PQ", colnames(ori.diet))])

personality.scores <- scoreItems(
  keys = personality.keys,
  items=ori.diet[,grepl("^PQ", colnames(ori.diet))],
  impute = "none")

personality.scores

## Call: scoreItems(keys = personality.keys, items = ori.diet[, grepl("^PQ",
##   colnames(ori.diet))], impute = "none")
##
## (Standardized) Alpha:
##      Extra Agree  Con  Neur  Open
## alpha  0.88  0.81  0.87  0.88  0.77
##
## Standard errors of unstandardized Alpha:
##      Extra Agree  Con  Neur  Open
## ASE  0.0047  0.0066  0.005  0.0047  0.0079
##
## Standardized Alpha of observed scales:
##      Extra Agree  Con  Neur  Open
## [1,]  0.88  0.81  0.87  0.88  0.77
##
## Average item correlation:
##      Extra Agree  Con  Neur  Open
## average.r  0.24  0.15  0.22  0.23  0.12
##

```

```

## Median item correlation:
## Extra Agree   Con   Neur   Open
## 0.23  0.16  0.22  0.22  0.11
##
## Guttman 6* reliability:
##           Extra Agree   Con Neur Open
## Lambda.6  0.93  0.88 0.92 0.92 0.85
##
## Signal/Noise based upon av.r :
##           Extra Agree Con Neur Open
## Signal/Noise  7.4   4.4 6.8  7.3  3.3
##
## Scale intercorrelations corrected for attenuation
## raw correlations below the diagonal, alpha on the diagonal
## corrected correlations above the diagonal:
##
## Note that these are the correlations of the complete scales based on the correlation matrix,
## not the observed scales based on the raw items.
##           Extra Agree   Con   Neur   Open
## Extra  0.88  0.25  0.427 -0.53  0.44
## Agree  0.22  0.81  0.463 -0.41  0.31
## Con    0.37  0.39  0.872 -0.59  0.12
## Neur  -0.46 -0.35 -0.514  0.88 -0.18
## Open   0.36  0.24  0.099 -0.15  0.77
##
## In order to see the item by scale loadings and frequency counts of the data
## print with the short option = FALSE

```

These scores are then added to the data frame.

```
ori.diet <- cbind(ori.diet, personality.scores$scores)
```

## 1.6 Socio-economic status composite

We first test the correlation between maximum lifetime income and highest grade completed in education to determine whether these may be averaged together to create a single indicator of socio-economic status.

```

cor(ori.diet[,c("q7maxinc", "highgrd")], use="pairwise")

##           q7maxinc   highgrd
## q7maxinc 1.0000000 0.3636618
## highgrd  0.3636618 1.0000000

```

The correlation is 1, 0.36, 0.36, 1, which is sufficient evidence to create a composite, which we do below.

```
ori.diet$SES <- as.numeric(pca(ori.diet[,c("q7maxinc", "highgrd")])$scores)
```

## 1.7 Age calculation

We the participant's age at the diet assessment by subtracting their birth year from the year of assessment. Birth years are recorded as the last two digits in the year (all participants were born between 1900 and 1999), so year of assessment was measured as years from 1900.

```
ori.diet$age_diet <- 99-ori.diet$birthyear
```

We remove participants who do not have scores for at least one of the big five personality scores and at least one of the covariates. We will repeat this process at a later step, although this ensures that the structure of the diet items remains relatively consistent throughout the analyses.

```
B5_scores <- c("Extra","Agree","Con","Neur","Open")
cov <- c("gender","age_diet")
ori.diet <- ori.diet[!is.na(rowSums(ori.diet[,B5_scores])), ]
ori.diet <- ori.diet[!is.na(rowSums(ori.diet[,cov])), ]
```

## 1.8 Create data frame of diet items, labels and text

We create a data frame of diet item labels and item text to reference after the factor analysis stage. This will allow for easier interpretation of the factors.

```
diet.items <- ori.diet[,diet.items]

df.dietItems <- data.frame(item = colnames(diet.items), stringsAsFactors = F)
df.dietItems$question <- diet.labels

colnames(diet.items) <- df.dietItems$question
```

## 2 Partial correlation function

I am extending the `corr.test` function available in the `psych` package by inserting code to calculate the residuals of the original variables after controlling for specified covariates. This function will be used to calculate the partial correlations of the diet factors with variables of interest.

```
partial.corr.test <- function (x, y = NULL, m,
                             use = "pairwise", method = "pearson",
                             adjust = "holm", alpha = 0.05, ci = TRUE)
{
  cl <- match.call()

  #NEW CODE BEGINS HERE
  covariates <- colnames(m)
  covariate.fun <- paste(covariates, collapse = " + ")

  new.x <- matrix(data = as.numeric(NA),
                 nrow = nrow(x), ncol=ncol(x))

  for(i in 1:ncol(x)){
    outcomes <- colnames(x)[i]
    prediction.eq <- as.formula(paste(outcomes, covariate.fun, sep = " ~ "))
    model <- lm(prediction.eq, data = cbind(x, m))
    missing <- attr(model$model, "na.action")
    if(is.null(missing)) new.x[,i] <- model$residuals
    else new.x[-missing,i] <- model$residuals
  }
  new.x <- as.data.frame(new.x)
  colnames(new.x) <- colnames(x)

  new.y <- matrix(data = as.numeric(NA),
                 nrow = nrow(y), ncol=ncol(y))

  for(i in 1:ncol(y)){
    outcomes <- colnames(y)[i]
    prediction.eq <- as.formula(paste(outcomes, covariate.fun, sep = " ~ "))
    model <- lm(prediction.eq, data = cbind(y, m))
    missing <- attr(model$model, "na.action")
    if(is.null(missing)) new.y[,i] <- model$residuals else new.y[-missing,i] <- model$residuals
  }
  new.y <- as.data.frame(new.y)
  colnames(new.y) <- colnames(y)

  x <- new.x
  y <- new.y

  # NEW CODE ENDS HERE

  if (is.null(y)) {
    r <- cor(x, use = use, method = method)
    sym <- TRUE
    n <- t(!is.na(x)) %*% (!is.na(x))
  }
}
```

```

}
else {
  r <- cor(x, y, use = use, method = method)
  sym = FALSE
  n <- t(!is.na(x)) %*% (!is.na(y))
}
if ((use == "complete" | (min(n) == max(n)))
    n <- min(n)
t <- (r * sqrt(n - 2))/sqrt(1 - r^2)
p <- 2 * (1 - pt(abs(t), (n - 2)))
se <- sqrt((1 - r * r)/(n - 2))
nvar <- ncol(r)
p[p > 1] <- 1
if (adjust != "none") {
  if (is.null(y)) {
    lp <- upper.tri(p)
    pa <- p[lp]
    pa <- p.adjust(pa, adjust)
    p[upper.tri(p, diag = FALSE)] <- pa
  }
  else {
    p[] <- p.adjust(p, adjust)
  }
}
z <- fisherz(r[lower.tri(r)])
if (ci) {
  if (min(n) < 4) {
    warning("Number of subjects must be greater than 3 to find confidence intervals.")
  }
  alpha <- 1 - alpha/2
  dif <- qnorm(alpha)
  if (sym) {
    if (is.matrix(n)) {
      se <- 1/sqrt(n[lower.tri(n)] - 3)
    }
    else {
      se <- 1/sqrt(n - 3)
    }
  }
  lower <- fisherz2r(z - dif * se)
  upper <- fisherz2r(z + dif * se)
  ci <- data.frame(lower = lower, r = r[lower.tri(r)],
                  upper = upper, p = p[lower.tri(p)])
  cnR <- abbreviate(colnames(r), minlength = 5)
  k <- 1
  for (i in 1:(nvar - 1)) {
    for (j in (i + 1):nvar) {
      rownames(ci)[k] <- paste(cnR[i], cnR[j], sep = "-")
      k <- k + 1
    }
  }
}
}

```

```

else {
  z <- fisherz(r)
  se <- 1/sqrt(n - 3)
  lower <- as.vector(fisherz2r(z - dif * se))
  upper <- as.vector(fisherz2r(z + dif * se))
  ci <- data.frame(lower = lower, r = as.vector(r),
                  upper = upper, p = as.vector(p))
  cnR <- abbreviate(rownames(r), minlength = 5)
  cnC <- abbreviate(colnames(r), minlength = 5)
  k <- 1
  for (i in 1:ncol(y)) {
    for (j in 1:ncol(x)) {
      rownames(ci)[k] <- paste(cnR[j], cnC[i], sep = "-")
      k <- k + 1
    }
  }
}
else {
  ci <- NULL
}
result <- list(r = r, n = n, t = t, p = p, se = se, adjust = adjust,
              sym = sym, ci = ci, Call = cl)
class(result) <- c("psych", "corr.test")
return(result)
}

```

## 3 Diet items factor analysis

### 3.1 How many factors

To determine the number of factors to extract from the diet items, we use the `nfactors` function from the `psych` package (Revelle, 2019). The function returns both a plot of fit statistics at many numbers of factors as well as a table of fit statistics. We examine these plots and tables to generate potential solutions.

We examine the plot for large jumps from one number of factors to the next. Jumps to and from variables can indicate solutions that are superior to the number of factors preceeding them, although whether the jump should begin or end with the solution at hand depends upon the fit statistic. In general, the fit statistics plotted should as low as possible, so whichever value is at the low point of the jump is the better solution.

We also examine the tables for points where solutions jump and/or meet agreed-upon cutoffs. For example, we might look for where the RMSEA drops below .10.

Based upon our examinations, we examine the **one-factor** solution (because RMSEA is below .10), the **two-factor** solution (based on jumps down to two at (because the empirical BIC and root mean residual jump down to two) and **three-factor** (because complexity jumps from three to four).

We will extract each of these solutions using factor analysis with an oblimin rotation. We chose factor analysis for two reasons. First, we hope to estimate a structure that is more generalizable, and factor analysis accounts for less variability than principal components analysis. Second, the lower variability in the factors provides a more conservative test of relationships of diet factors with other outcomes. We chose an oblimin rotation as we don't believe eating certain categories or groups of food should be independent of eating other groups of food.



```
nfactors(diet.items)
```

### Very Simple Structure

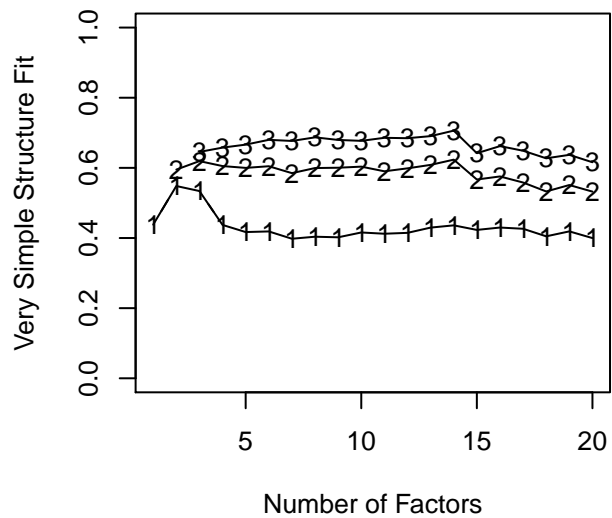

### Complexity

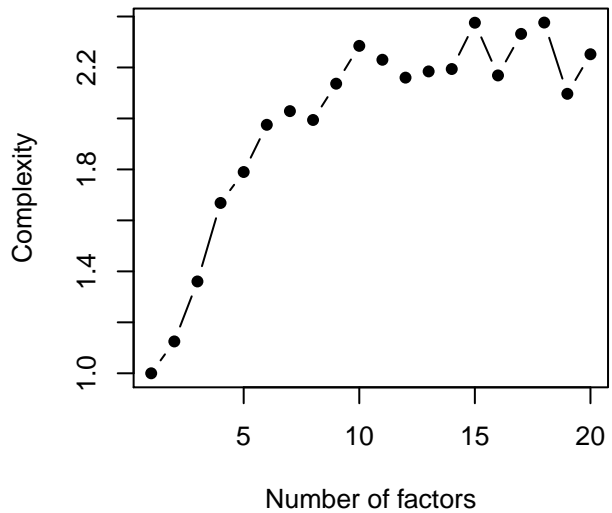

### Empirical BIC

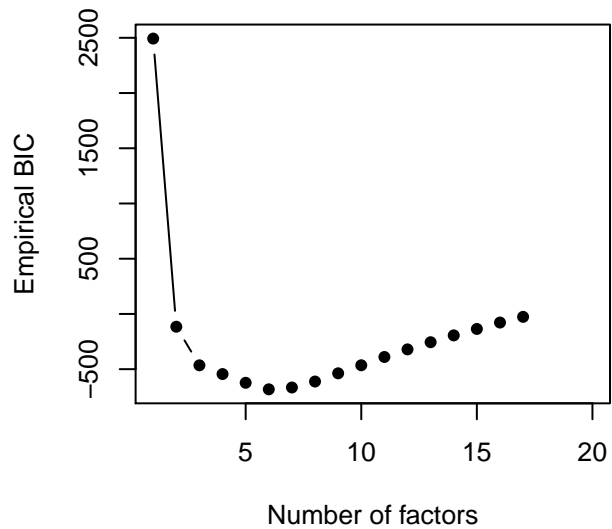

### Root Mean Residual

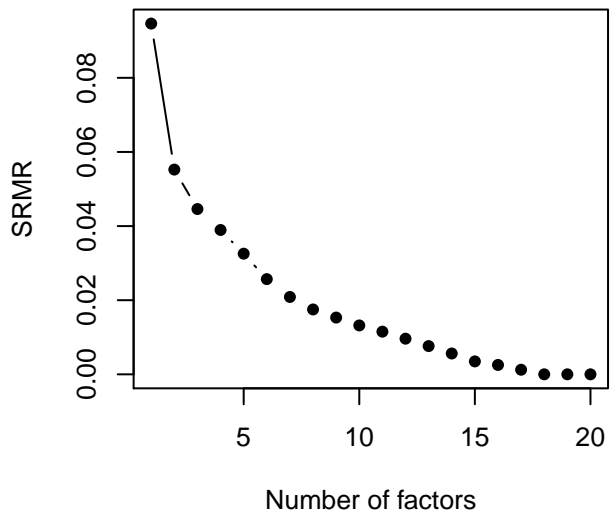

```

##
## Number of factors
## Call: vss(x = x, n = n, rotate = rotate, diagonal = diagonal, fm = fm,
##       n.obs = n.obs, plot = FALSE, title = title, use = use, cor = cor)
## VSS complexity 1 achieves a maximum of 0.55 with 2 factors
## VSS complexity 2 achieves a maximum of 0.62 with 14 factors
## The Velicer MAP achieves a minimum of 0.01 with 2 factors
## Empirical BIC achieves a minimum of -682.39 with 6 factors
## Sample Size adjusted BIC achieves a minimum of -229.82 with 8 factors
##
## Statistics by number of factors
##   vss1 vss2  map dof  chisq  prob sqresid fit RMSEA BIC SABIC complex eChisq SRMR eCRMS eBIC
## 1  0.44 0.00 0.014 252 2.1e+03 3.8e-281 22.8 0.44 0.0927 363 1164 1.0 4.2e+03 9.5e-02 0.099 2493
## 2  0.55 0.60 0.010 229 1.1e+03 2.9e-111 16.4 0.60 0.0669 -459 268 1.1 1.4e+03 5.5e-02 0.061 -116
## 3  0.53 0.62 0.011 207 8.4e+02 1.6e-77 14.4 0.65 0.0607 -553 104 1.4 9.3e+02 4.5e-02 0.051 -465
## 4  0.44 0.61 0.014 186 6.9e+02 1.7e-58 13.2 0.67 0.0569 -568 23 1.7 7.1e+02 3.9e-02 0.047 -544
## 5  0.42 0.60 0.016 166 5.1e+02 5.5e-37 12.2 0.70 0.0502 -607 -80 1.8 5.0e+02 3.3e-02 0.042 -623
## 6  0.42 0.60 0.018 147 3.4e+02 1.8e-17 11.1 0.73 0.0400 -650 -183 2.0 3.1e+02 2.6e-02 0.035 -682
## 7  0.40 0.58 0.021 129 2.5e+02 1.5e-09 10.3 0.74 0.0336 -622 -212 2.0 2.0e+02 2.1e-02 0.031 -666
## 8  0.40 0.60 0.026 112 1.7e+02 3.6e-04 9.7 0.76 0.0253 -585 -230 2.0 1.4e+02 1.8e-02 0.027 -612
## 9  0.40 0.60 0.031 96 1.3e+02 6.7e-03 9.2 0.77 0.0222 -514 -209 2.1 1.1e+02 1.5e-02 0.026 -538
## 10 0.42 0.60 0.036 81 1.1e+02 1.0e-02 8.7 0.79 0.0225 -433 -175 2.3 8.2e+01 1.3e-02 0.024 -465
## 11 0.41 0.59 0.043 67 8.7e+01 5.0e-02 8.2 0.80 0.0196 -365 -152 2.2 6.2e+01 1.2e-02 0.023 -390
## 12 0.41 0.60 0.052 54 5.7e+01 3.6e-01 7.8 0.81 0.0098 -307 -135 2.2 4.3e+01 9.6e-03 0.022 -321
## 13 0.43 0.61 0.062 42 3.9e+01 6.2e-01 7.2 0.82 0.0000 -245 -111 2.2 2.7e+01 7.6e-03 0.020 -256
## 14 0.44 0.62 0.075 31 2.3e+01 8.3e-01 6.5 0.84 0.0000 -186 -87 2.2 1.5e+01 5.6e-03 0.017 -194
## 15 0.42 0.57 0.088 21 1.1e+01 9.7e-01 6.1 0.85 0.0000 -131 -64 2.4 5.7e+00 3.5e-03 0.013 -136
## 16 0.43 0.58 0.105 12 6.3e+00 9.0e-01 5.8 0.86 0.0000 -75 -36 2.2 3.0e+00 2.5e-03 0.012 -78
## 17 0.43 0.56 0.127 4 1.3e+00 8.5e-01 5.5 0.86 0.0000 -26 -13 2.3 7.2e-01 1.2e-03 0.010 -26
## 18 0.40 0.53 0.153 -3 7.4e-05 NA 5.9 0.86 NA NA NA 2.4 3.5e-05 8.6e-06 NA NA
## 19 0.42 0.55 0.187 -9 1.5e-05 NA 5.8 0.86 NA NA NA 2.1 6.9e-06 3.8e-06 NA NA
## 20 0.40 0.53 0.241 -14 9.1e-06 NA 6.0 0.85 NA NA NA 2.3 4.5e-06 3.1e-06 NA NA

```

## 3.2 One-factor solution

```
one.factor <- fa(diet.items)
print(fa.sort(one.factor), cut = .2)

## Factor Analysis using method = minres
## Call: fa(r = diet.items)
## Standardized loadings (pattern matrix) based upon correlation matrix
##
##              MR1      h2    u2 com
## HAMBURGERS/CHEESEBURGERS    0.66 0.43256 0.57 1
## FRENCH FRIES                0.63 0.39441 0.61 1
## SAUSAGE/BACON/HOT DOGS     0.61 0.36673 0.63 1
## SPAM/HAM/LUNCHEON MEATS    0.51 0.26124 0.74 1
## DOUGHNUTS/PASTRY..        0.48 0.22674 0.77 1
## STEAK/ROAST                0.48 0.22574 0.77 1
## POTATO/CORN CHIPS          0.47 0.22232 0.78 1
## ICE CREAM                   0.46 0.21578 0.78 1
## MAYONNAISE/REGULAR SALAD DRESSINGS 0.36 0.12656 0.87 1
## SKIM/1% FAT MILK           -0.34 0.11309 0.89 1
## MACARONI,POTATO..SALAD W/MAYO 0.34 0.11274 0.89 1
## PIZZA                       0.33 0.11199 0.89 1
## CHOW MEIN                   0.33 0.11120 0.89 1
## SPAGHETTI W/MEAT OR CREAM SAUCE 0.32 0.10021 0.90 1
## BUTTER/MARGARINE/PEANUT BUTTER 0.31 0.09719 0.90 1
## RICE                        0.29 0.08670 0.91 1
## HIGH FIBER CEREALS         -0.27 0.07173 0.93 1
## FRUIT                       -0.25 0.06059 0.94 1
## VEGETABLES                 -0.25 0.06018 0.94 1
## DARK WHOLE GRAIN BREADS    -0.24 0.05601 0.94 1
## 2% FAT/WHOLE MILK          0.21 0.04519 0.95 1
## POI                         0.01742 0.98 1
## TOFU                        0.00645 0.99 1
## CHICKEN/FISH               0.00002 1.00 1
##
##              MR1
## SS loadings    3.52
## Proportion Var 0.15
##
## Mean item complexity = 1
```

```

## Test of the hypothesis that 1 factor is sufficient.
##
## The degrees of freedom for the null model are 276 and the objective function was 4.78 with Chi Square of 4010.45
## The degrees of freedom for the model are 252 and the objective function was 2.46
##
## The root mean square of the residuals (RMSR) is 0.09
## The df corrected root mean square of the residuals is 0.1
##
## The harmonic number of observations is 703 with the empirical chi square 3474.54 with prob < 0
## The total number of observations was 848 with Likelihood Chi Square = 2062.52 with prob < 3.8e-281
##
## Tucker Lewis Index of factoring reliability = 0.469
## RMSEA index = 0.093 and the 90 % confidence intervals are 0.088 0.096
## BIC = 363.32
## Fit based upon off diagonal values = 0.7
## Measures of factor score adequacy
##
## Correlation of (regression) scores with factors MR1 0.91
## Multiple R square of scores with factors 0.83
## Minimum correlation of possible factor scores 0.65

```

### 3.3 Two-factor solution

```
two.factor <- fa(diet.items, nfactors = 2, rotate="oblimin")
print(fa.sort(two.factor), cut = .2)

## Factor Analysis using method = minres
## Call: fa(r = diet.items, nfactors = 2, rotate = "oblimin")
## Standardized loadings (pattern matrix) based upon correlation matrix
##
##              MR1   MR2   h2   u2 com
## HAMBURGERS/CHEESEBURGERS    0.62      0.425 0.57 1.1
## FRENCH FRIES                0.62      0.397 0.60 1.0
## SAUSAGE/BACON/HOT DOGS     0.57      0.362 0.64 1.1
## DOUGHNUTS/PASTRY..         0.53      0.274 0.73 1.1
## POTATO/CORN CHIPS          0.51      0.250 0.75 1.0
## SPAM/HAM/LUNCHEON MEATS    0.50      0.262 0.74 1.0
## STEAK/ROAST                0.49      0.236 0.76 1.0
## ICE CREAM                   0.48      0.227 0.77 1.0
## MAYONNAISE/REGULAR SALAD DRESSINGS 0.44      0.195 0.81 1.3
## BUTTER/MARGARINE/PEANUT BUTTER 0.42 0.24 0.198 0.80 1.6
## PIZZA                       0.35      0.120 0.88 1.0
## MACARONI,POTATO..SALAD W/MAYO 0.35      0.120 0.88 1.0
## SPAGHETTI W/MEAT OR CREAM SAUCE 0.35      0.116 0.88 1.1
## CHOW MEIN                   0.30      0.111 0.89 1.3
## RICE                        0.28      0.086 0.91 1.0
## 2% FAT/WHOLE MILK          0.24      0.058 0.94 1.1
## POI                          0.030 0.97 1.4
## FRUIT                       0.77 0.586 0.41 1.0
## VEGETABLES                  0.71 0.503 0.50 1.0
## HIGH FIBER CEREALS          0.58 0.354 0.65 1.0
## DARK WHOLE GRAIN BREADS     0.51 0.273 0.73 1.0
## SKIM/1% FAT MILK           0.39 0.219 0.78 1.5
## CHICKEN/FISH                0.26 0.068 0.93 1.3
## TOFU                        0.25 0.062 0.94 1.0
##
##              MR1   MR2
## SS loadings    3.40 2.14
## Proportion Var 0.14 0.09
## Cumulative Var 0.14 0.23
## Proportion Explained 0.61 0.39
```

```

## Cumulative Proportion 0.61 1.00
##
## With factor correlations of
##      MR1  MR2
## MR1  1.00 -0.19
## MR2 -0.19  1.00
##
## Mean item complexity = 1.1
## Test of the hypothesis that 2 factors are sufficient.
##
## The degrees of freedom for the null model are 276 and the objective function was 4.78 with Chi Square of 4010.45
## The degrees of freedom for the model are 229 and the objective function was 1.3
##
## The root mean square of the residuals (RMSR) is 0.06
## The df corrected root mean square of the residuals is 0.06
##
## The harmonic number of observations is 703 with the empirical chi square 1184.65 with prob < 1.4e-128
## The total number of observations was 848 with Likelihood Chi Square = 1085.05 with prob < 2.9e-111
##
## Tucker Lewis Index of factoring reliability = 0.723
## RMSEA index = 0.067 and the 90 % confidence intervals are 0.062 0.07
## BIC = -459.07
## Fit based upon off diagonal values = 0.9
## Measures of factor score adequacy
##
##                                     MR1  MR2
## Correlation of (regression) scores with factors 0.91 0.89
## Multiple R square of scores with factors 0.83 0.80
## Minimum correlation of possible factor scores 0.65 0.59

```

### 3.4 Three-factor solution

```
three.factor <- fa(diet.items, nfactors = 3, , rotate="oblimin")
print(fa.sort(three.factor), cut = .2)

## Factor Analysis using method = minres
## Call: fa(r = diet.items, nfactors = 3, rotate = "oblimin")
## Standardized loadings (pattern matrix) based upon correlation matrix
##
##          MR1  MR2  MR3   h2  u2 com
## HAMBURGERS/CHEESEBURGERS    0.62          0.424 0.58 1.1
## FRENCH FRIES                0.61          0.394 0.61 1.0
## SAUSAGE/BACON/HOT DOGS     0.58          0.377 0.62 1.1
## DOUGHNUTS/PASTRY..         0.53          0.272 0.73 1.1
## POTATO/CORN CHIPS          0.50          0.251 0.75 1.1
## SPAM/HAM/LUNCHEON MEATS    0.50          0.260 0.74 1.0
## STEAK/ROAST                0.49          0.243 0.76 1.0
## ICE CREAM                   0.48          0.227 0.77 1.0
## BUTTER/MARGARINE/PEANUT BUTTER 0.47 0.30 -0.33 0.373 0.63 2.5
## MAYONNAISE/REGULAR SALAD DRESSINGS 0.44          0.197 0.80 1.3
## PIZZA                       0.34          0.121 0.88 1.1
## MACARONI,POTATO..SALAD W/MAYO 0.34          0.120 0.88 1.1
## SPAGHETTI W/MEAT OR CREAM SAUCE 0.33          0.131 0.87 1.4
## 2% FAT/WHOLE MILK          0.25          0.072 0.93 1.4
## FRUIT                       0.75          0.571 0.43 1.0
## VEGETABLES                  0.69          0.499 0.50 1.0
## HIGH FIBER CEREALS         0.60          0.371 0.63 1.1
## DARK WHOLE GRAIN BREADS    0.51          0.275 0.72 1.0
## SKIM/1% FAT MILK           0.41          0.229 0.77 1.5
## CHICKEN/FISH               0.23          0.098 0.90 2.2
## TOFU                       0.21 0.63 0.455 0.55 1.2
## RICE                       0.26          0.39 0.234 0.77 1.9
## CHOW MEIN                  0.28          0.30 0.197 0.80 2.5
## POI                        0.21 0.066 0.93 2.0
##
##
##          MR1  MR2  MR3
## SS loadings    3.39 2.16 0.91
## Proportion Var 0.14 0.09 0.04
## Cumulative Var 0.14 0.23 0.27
## Proportion Explained 0.52 0.33 0.14
```



```

## Cumulative Proportion 0.52 0.86 1.00
##
## With factor correlations of
##      MR1  MR2  MR3
## MR1  1.00 -0.16 -0.02
## MR2 -0.16  1.00  0.06
## MR3 -0.02  0.06  1.00
##
## Mean item complexity = 1.4
## Test of the hypothesis that 3 factors are sufficient.
##
## The degrees of freedom for the null model are 276 and the objective function was 4.78 with Chi Square of 4010.45
## The degrees of freedom for the model are 207 and the objective function was 1.01
##
## The root mean square of the residuals (RMSR) is 0.04
## The df corrected root mean square of the residuals is 0.05
##
## The harmonic number of observations is 703 with the empirical chi square 771.25 with prob < 5.7e-66
## The total number of observations was 848 with Likelihood Chi Square = 842.44 with prob < 1.6e-77
##
## Tucker Lewis Index of factoring reliability = 0.773
## RMSEA index = 0.061 and the 90 % confidence intervals are 0.056 0.064
## BIC = -553.33
## Fit based upon off diagonal values = 0.93
## Measures of factor score adequacy
##
##                                     MR1  MR2  MR3
## Correlation of (regression) scores with factors 0.91 0.89 0.77
## Multiple R square of scores with factors 0.83 0.80 0.59
## Minimum correlation of possible factor scores 0.66 0.59 0.17

```

We choose to use the two-factor solution as we believe its parsimony is not compromised by failure to adequately represent the items. To this point, all items have loadings of at least absolute value .20. We name these factors “Unhealthy foods” and “Healthy foods” respectively, and add the estimated factor scores to the data frame.

```
colnames(two.factor$scores) <- c("Unhealthy", "Healthy")
ori.diet <- cbind(ori.diet, two.factor$scores)
```

## 4 Subset data and calculate demographics

We create vectors that hold the names of the variables of interest by category. Specifically, we create a vector for the diet factors estimated, for the Big Five personality traits, for the health variables of interest, for proposed moderators of the relationship between diet and health, and finally for the covariates.

```
B5_scores <- c("Extra", "Agree", "Con", "Neur", "Open")
diet <- c("Healthy", "Unhealthy")
cov <- c("gender", "age_diet")
health <- c("SelfRatedHealth", "BMI", "Type2Diabetes")
moderators <- c("SES")
```

We remove participants who do not have scores for at least one of the big five personality scores, at least one of the diet estimates and at least one of the covariates.

```
ori.diet <- ori.diet[!is.na(rowSums(ori.diet[,B5_scores])), ]
ori.diet <- ori.diet[!is.na(rowSums(ori.diet[,diet])), ]
ori.diet <- ori.diet[!is.na(rowSums(ori.diet[,cov])), ]
```

Because sample sizes varied between questionnaires, we estimate sample sizes for the various analyses we present.

```
has.personality <- which(!is.na(rowMeans(ori.diet[, B5_scores], na.rm=T)))
has.health <- which(!is.na(rowMeans(ori.diet[, health], na.rm=T)))
has.SES <- which(!is.na(ori.diet[, "SES"]))
has.food <- which(!is.na(ori.diet[, "Healthy"]))

# Personality and health
length(which(has.personality %in% has.health))

## [1] 592

# SES and health
length(which(has.SES %in% has.health))

## [1] 414

#has all three
has.person_and_health <- has.personality[which(has.personality %in% has.health)]
length(which(has.person_and_health %in% has.SES))

## [1] 414
```

We then calculate descriptive statistics for each of our variables using the describe function in the psych package (Revelle, 2019) and format the resulting table using the stargazer package (Hlavac, 2018).

```
stargazer(describe(ori.diet[,c(B5_scores, diet, cov, "age_clinic",
                             health,
                             "q7maxinc", "highgrd", moderators)]),
          summary=F, digits=2,
          title="Descriptives of ORI data", out = "descriptives.tex", label="describe")
```

|                 | vars | n   | mean  | sd   | median | trimmed | mad  | min   | max   | range | skew  | kurtosis | se   |
|-----------------|------|-----|-------|------|--------|---------|------|-------|-------|-------|-------|----------|------|
| Extra           | 1    | 665 | 3.41  | 0.53 | 3.42   | 3.42    | 0.56 | 1.88  | 4.71  | 2.83  | -0.28 | -0.19    | 0.02 |
| Agree           | 2    | 665 | 3.83  | 0.40 | 3.83   | 3.84    | 0.37 | 2.21  | 4.92  | 2.71  | -0.30 | 0.43     | 0.02 |
| Con             | 3    | 665 | 4.01  | 0.46 | 4      | 4.02    | 0.43 | 2.46  | 5     | 2.54  | -0.19 | -0.14    | 0.02 |
| Neur            | 4    | 665 | 2.58  | 0.56 | 2.50   | 2.56    | 0.49 | 1.12  | 4.38  | 3.25  | 0.42  | 0.18     | 0.02 |
| Open            | 5    | 665 | 3.14  | 0.42 | 3.12   | 3.13    | 0.37 | 1.50  | 4.75  | 3.25  | 0.24  | 0.76     | 0.02 |
| Healthy         | 6    | 665 | -0.02 | 0.89 | -0.04  | -0.04   | 0.98 | -2.20 | 2.79  | 4.99  | 0.21  | -0.50    | 0.03 |
| Unhealthy       | 7    | 665 | 0.01  | 0.90 | -0.10  | -0.04   | 0.80 | -2.28 | 4.91  | 7.19  | 0.65  | 1.44     | 0.03 |
| gender          | 8    | 665 | 0.48  | 0.50 | 0      | 0.48    | 0    | 0     | 1     | 1     | 0.06  | -2.00    | 0.02 |
| age_diet        | 9    | 665 | 44.09 | 1.97 | 44     | 44.07   | 2.97 | 40    | 48    | 8     | -0.07 | -0.83    | 0.08 |
| age_clinic      | 10   | 425 | 51.27 | 2.68 | 51.08  | 51.14   | 2.47 | 45.50 | 59.67 | 14.17 | 0.41  | -0.07    | 0.13 |
| SelfRatedHealth | 11   | 487 | 3.29  | 0.94 | 3      | 3.28    | 1.48 | 1     | 5     | 4     | -0.15 | -0.29    | 0.04 |
| BMI             | 12   | 493 | 28.58 | 6.39 | 27.41  | 27.94   | 5.58 | 16.22 | 56.41 | 40.20 | 1.19  | 2.19     | 0.29 |
| Type2Diabetes   | 13   | 486 | 0.19  | 0.39 | 0      | 0.11    | 0    | 0     | 1     | 1     | 1.62  | 0.61     | 0.02 |
| q7maxinc        | 14   | 415 | 3.69  | 1.04 | 4      | 3.76    | 1.48 | 1     | 5     | 4     | -0.15 | -0.83    | 0.05 |
| highgrd         | 15   | 663 | 7.00  | 1.73 | 7      | 7.15    | 1.48 | 1     | 9     | 8     | -0.83 | -0.37    | 0.07 |
| SES             | 16   | 414 | 0.20  | 0.91 | 0.29   | 0.25    | 0.86 | -2.41 | 1.51  | 3.91  | -0.38 | -0.61    | 0.04 |

Table 1: Descriptives of ORI data

Next we examine the correlations between study variables and the covariates, and we also calculate means and standard deviations by gender.

```
corr.test(x = ori.diet[,c(B5_scores, diet, health, cov, "age_clinic",
                          "q7maxinc", "highgrd", moderators)],
          y = ori.diet[,c(cov, "SES")], adjust = "none")

## Call:corr.test(x = ori.diet[, c(B5_scores, diet, health, cov, "age_clinic",
##   "q7maxinc", "highgrd", moderators)], y = ori.diet[, c(cov,
##   "SES")], adjust = "none")
## Correlation matrix
##           gender age_diet  SES
## Extra      -0.10  -0.07 -0.01
## Agree      -0.26   0.01  0.00
## Con        -0.06  -0.01  0.19
## Neur       -0.06  -0.02 -0.17
## Open       -0.18   0.04  0.16
## Healthy    -0.13   0.11  0.23
## Unhealthy   0.16  -0.09 -0.13
## SelfRatedHealth -0.12  0.06  0.24
## BMI        0.20  -0.03 -0.20
## Type2Diabetes 0.02  -0.01 -0.13
## gender     1.00   0.02  0.15
## age_diet   0.02   1.00  0.23
```

```

## age_clinic      0.07      0.64  0.11
## q7maxinc       0.26      0.17  0.86
## highgrd       -0.04      0.17  0.79
## SES            0.15      0.23  1.00
## Sample Size
##               gender age_diet SES
## Extra          665      665 414
## Agree          665      665 414
## Con            665      665 414
## Neur          665      665 414
## Open          665      665 414
## Healthy       665      665 414
## Unhealthy     665      665 414
## SelfRatedHealth 487      487 412
## BMI           493      493 328
## Type2Diabetes 486      486 412
## gender        665      665 414
## age_diet      665      665 414
## age_clinic    425      425 286
## q7maxinc     415      415 414
## highgrd     663      663 414
## SES         414      414 414
##               gender age_diet SES
## Extra          0.01      0.05 0.88
## Agree          0.00      0.79 0.92
## Con            0.13      0.70 0.00
## Neur          0.11      0.56 0.00
## Open          0.00      0.32 0.00
## Healthy       0.00      0.01 0.00
## Unhealthy     0.00      0.02 0.01
## SelfRatedHealth 0.01      0.16 0.00
## BMI           0.00      0.57 0.00
## Type2Diabetes 0.65      0.78 0.01
## gender        0.00      0.65 0.00
## age_diet      0.65      0.00 0.00
## age_clinic    0.16      0.00 0.05
## q7maxinc     0.00      0.00 0.00
## highgrd     0.28      0.00 0.00
## SES         0.00      0.00 0.00
##
## To see confidence intervals of the correlations, print with the short=FALSE option

describeBy(ori.diet[,c(B5_scores, diet, health,
                      "q7maxinc", "highgrd"), moderators,
           cov, "age_clinic"],
           group = ori.diet$gender)

##
## Descriptive statistics by group
## group: 0
##               vars  n mean  sd median trimmed mad  min  max range skew kurtosis  se
## Extra           1 343  3.46 0.52  3.50  3.48 0.49  1.88  4.71  2.83 -0.37  0.01 0.03

```

```

## Agree      2 343  3.93 0.38  3.96  3.94 0.37  2.50  4.92  2.42 -0.35  0.42 0.02
## Con       3 343  4.03 0.46  4.04  4.04 0.43  2.75  5.00  2.25 -0.19 -0.16 0.02
## Neur      4 343  2.62 0.59  2.54  2.59 0.56  1.12  4.38  3.25  0.45 -0.05 0.03
## Open      5 343  3.21 0.42  3.17  3.20 0.37  1.96  4.75  2.79  0.40  0.74 0.02
## Healthy   6 343  0.10 0.88  0.11  0.09 0.92 -2.20  2.52  4.73  0.11 -0.53 0.05
## Unhealthy  7 343 -0.13 0.82 -0.21 -0.17 0.77 -2.28  3.57  5.85  0.58  1.30 0.04
## SelfRatedHealth 8 260  3.40 0.89  3.00  3.41 1.48  1.00  5.00  4.00 -0.30 -0.03 0.06
## BMI       9 256 27.34 6.70 25.60 26.56 5.49 16.22 56.41 40.20  1.30  2.24 0.42
## Type2Diabetes 10 259  0.18 0.38  0.00  0.10 0.00  0.00  1.00  1.00  1.68  0.82 0.02
## q7maxinc  11 209  3.43 1.00  3.00  3.45 1.48  1.00  5.00  4.00  0.03 -0.41 0.07
## highgrd   12 343  7.07 1.67  7.00  7.23 1.48  2.00  9.00  7.00 -0.89 -0.27 0.09
## SES       13 209  0.06 0.86  0.03  0.08 0.86 -2.41  1.51  3.91 -0.26 -0.45 0.06
## gender    14 343  0.00 0.00  0.00  0.00 0.00  0.00  0.00  0.00  NaN  NaN 0.00
## age_diet  15 343 44.06 2.04 44.00 44.00 2.97 40.00 48.00  8.00  0.03 -0.88 0.11
## age_clinic 16 221 51.09 2.78 51.00 50.99 2.72 45.50 58.67 13.17  0.27 -0.39 0.19
## -----
## group: 1
##          vars  n  mean  sd median trimmed mad  min  max range skew kurtosis  se
## Extra      1 322  3.35 0.53  3.36  3.36 0.54  1.88  4.71  2.83 -0.19 -0.35 0.03
## Agree      2 322  3.73 0.39  3.74  3.73 0.38  2.21  4.79  2.58 -0.29  0.62 0.02
## Con        3 322  3.98 0.46  3.98  3.99 0.46  2.46  4.96  2.50 -0.20 -0.13 0.03
## Neur       4 322  2.55 0.52  2.49  2.53 0.45  1.17  4.29  3.12  0.30  0.31 0.03
## Open       5 322  3.07 0.40  3.06  3.06 0.40  1.50  4.42  2.92  0.00  0.50 0.02
## Healthy    6 322 -0.14 0.88 -0.22 -0.17 0.95 -2.14  2.79  4.93  0.32 -0.40 0.05
## Unhealthy  7 322  0.16 0.95  0.10  0.12 0.90 -2.10  4.91  7.01  0.59  1.32 0.05
## SelfRatedHealth 8 227  3.17 0.98  3.00  3.14 1.48  1.00  5.00  4.00  0.04 -0.45 0.07
## BMI        9 237 29.91 5.76 28.90 29.24 4.65 20.47 53.91 33.44  1.41  2.84 0.37
## Type2Diabetes 10 227  0.19 0.40  0.00  0.12 0.00  0.00  1.00  1.00  1.54  0.37 0.03
## q7maxinc   11 206  3.96 1.00  4.00  4.03 1.48  1.00  5.00  4.00 -0.36 -1.09 0.07
## highgrd    12 320  6.93 1.79  7.00  7.07 1.48  1.00  9.00  8.00 -0.76 -0.50 0.10
## SES        13 205  0.34 0.93  0.55  0.42 0.95 -1.83  1.51  3.33 -0.57 -0.60 0.07
## gender     14 322  1.00 0.00  1.00  1.00 0.00  1.00  1.00  0.00  NaN  NaN 0.00
## age_diet   15 322 44.12 1.88 44.00 44.16 2.97 40.00 48.00  8.00 -0.20 -0.78 0.10
## age_clinic 16 204 51.46 2.56 51.12 51.29 2.16 46.83 59.67 12.83  0.64  0.24 0.18

```

We also calculate standardized difference between variables on gender using the cohensD function in lsr Navarro (2015).

```

d.scores <- data.frame()
for(i in c(B5_scores, diet, health, "age_diet", "q7maxinc", "highgrd", moderators)){
  formula <- as.formula(paste(i, "gender", sep=" ~ "))
  d.scores[i, "d"] <- cohensD(formula, data = ori.diet)
  d.scores[i, "p"] <- t.test(formula, data = ori.diet)$p.value
  d.scores[i, "t"] <- t.test(formula, data = ori.diet)$statistic
  d.scores[i, "df"] <- t.test(formula, data = ori.diet)$parameter
}
round(d.scores, 2)

##          d      p      t      df
## Extra    0.19 0.01  2.50 658.59
## Agree    0.53 0.00  6.84 659.23
## Con      0.12 0.13  1.50 661.26

```

```
## Neur      0.12 0.11  1.61 659.02
## Open      0.36 0.00  4.71 662.88
## Healthy   0.27 0.00  3.49 660.55
## Unhealthy 0.33 0.00 -4.23 633.14
## SelfRatedHealth 0.24 0.01  2.63 459.33
## BMI       0.41 0.00 -4.58 488.34
## Type2Diabetes 0.04 0.65 -0.46 471.00
## age_diet  0.03 0.65 -0.45 662.77
## q7maxinc  0.53 0.00 -5.39 412.93
## highgrd   0.08 0.28  1.07 649.09
## SES       0.31 0.00 -3.17 408.17
```

```
for(i in c(B5_scores, B5_scores, diet, cov, "age_clinic",
          health, moderators, "q7maxinc", "highgrd")){
  ori.diet[,i] <- as.numeric(scale(ori.diet[,i]))
}
```

## 5 Correlations with Big Five and outcomes

We then calculate zero-rder correlations between personality traits/health outcomes and the diet factors. We also calculate partial correlations between these variables controlling for our covariates.

```
R.zero <- corr.test(x = ori.diet[,c(B5_scores, health)],
                  y = ori.diet[,c(diet, health)],
                  adjust = "none")
R.part <- partial.corr.test(x = ori.diet[,c(B5_scores, health)],
                           y = ori.diet[,c(diet, health)],
                           m = ori.diet[,cov],
                           adjust = "none")
```

These results are printed, unformatted, here for those interested in seeing exact p-values and sample sizes for each correlation.

```
R.zero
## Call:corr.test(x = ori.diet[, c(B5_scores, health)], y = ori.diet[,
##      c(diet, health)], adjust = "none")
## Correlation matrix
##           Healthy Unhealthy SelfRatedHealth  BMI Type2Diabetes
## Extra      0.07   -0.01      0.19  0.01      0.00
## Agree      0.12   -0.13      0.14 -0.07     -0.01
## Con        0.17   -0.14      0.23 -0.05     -0.04
## Neur      -0.16    0.11     -0.33  0.13      0.06
## Open       0.20   -0.16      0.18 -0.13     -0.04
## SelfRatedHealth 0.24   -0.16      1.00 -0.31     -0.31
## BMI       -0.20    0.09     -0.31  1.00      0.38
## Type2Diabetes -0.10    0.06     -0.31  0.38      1.00
## Sample Size
##           Healthy Unhealthy SelfRatedHealth BMI Type2Diabetes
```

```

## Extra          665      665      487 493      486
## Agree          665      665      487 493      486
## Con            665      665      487 493      486
## Neur           665      665      487 493      486
## Open           665      665      487 493      486
## SelfRatedHealth 487      487      487 389      484
## BMI            493      493      389 493      388
## Type2Diabetes  486      486      484 388      486
##
##              Healthy Unhealthy SelfRatedHealth  BMI Type2Diabetes
## Extra          0.09      0.79          0 0.81      0.96
## Agree          0.00      0.00          0 0.15      0.76
## Con            0.00      0.00          0 0.27      0.38
## Neur           0.00      0.00          0 0.00      0.22
## Open           0.00      0.00          0 0.00      0.36
## SelfRatedHealth 0.00      0.00          0 0.00      0.00
## BMI            0.00      0.06          0 0.00      0.00
## Type2Diabetes  0.03      0.21          0 0.00      0.00
##
## To see confidence intervals of the correlations, print with the short=FALSE option

```

R.part

```

## Call:partial.corr.test(x = ori.diet[, c(B5_scores, health)], y = ori.diet[,
##       c(diet, health)], m = ori.diet[, cov], adjust = "none")
## Correlation matrix
##              Healthy Unhealthy SelfRatedHealth  BMI Type2Diabetes
## Extra          0.06      0.00          0.18 0.04      0.00
## Agree          0.09     -0.09          0.12 -0.01     -0.01
## Con            0.16     -0.13          0.23 -0.04     -0.04
## Neur          -0.16      0.12         -0.33 0.15      0.06
## Open           0.18     -0.14          0.16 -0.10     -0.04
## SelfRatedHealth 0.22     -0.14          1.00 -0.29     -0.31
## BMI           -0.18      0.05         -0.29 1.00      0.38
## Type2Diabetes -0.09      0.05         -0.31 0.38      1.00
## Sample Size
##              Healthy Unhealthy SelfRatedHealth  BMI Type2Diabetes
## Extra          665      665      487 493      486
## Agree          665      665      487 493      486
## Con            665      665      487 493      486
## Neur           665      665      487 493      486
## Open           665      665      487 493      486
## SelfRatedHealth 487      487      487 389      484
## BMI            493      493      389 493      388
## Type2Diabetes  486      486      484 388      486
##
##              Healthy Unhealthy SelfRatedHealth  BMI Type2Diabetes
## Extra          0.11      0.97          0.00 0.41      0.93
## Agree          0.02      0.02          0.01 0.75      0.85
## Con            0.00      0.00          0.00 0.34      0.40
## Neur           0.00      0.00          0.00 0.00      0.22
## Open           0.00      0.00          0.00 0.02      0.41
## SelfRatedHealth 0.00      0.00          0.00 0.00      0.00
## BMI            0.00      0.24          0.00 0.00      0.00

```

```
## Type2Diabetes      0.04      0.23      0.00 0.00      0.00
##
## To see confidence intervals of the correlations, print with the short=FALSE option
```

We also examine the partial correlations of BMI with personality and diet controlling for age at the clinic assessment, as this is not perfectly correlated with age at the diet assessment. Past analyses of the Hawaii clinic sample suggest this age variable has stronger correlations with clinic-assessed outcomes. In the manuscript, we present these correlations.

```
R.part.BMI <- partial.corr.test(x = ori.diet[,c(B5_scores, health, diet)],
                                y = ori.diet[,c("BMI", "SelfRatedHealth")],
                                m = ori.diet[,c("gender", "age_clinic")],
                                adjust = "none")
```

```
R.part.BMI
```

```
## Call:partial.corr.test(x = ori.diet[, c(B5_scores, health, diet)],
##      y = ori.diet[, c("BMI", "SelfRatedHealth")], m = ori.diet[,
##      c("gender", "age_clinic")], adjust = "none")
```

```
## Correlation matrix
##
##           BMI SelfRatedHealth
## Extra      0.06      0.12
## Agree      0.00      0.15
## Con       -0.04      0.23
## Neur       0.13     -0.34
## Open      -0.10      0.13
## SelfRatedHealth -0.31      1.00
## BMI        1.00     -0.31
## Type2Diabetes  0.37     -0.32
## Healthy   -0.18      0.30
## Unhealthy  0.02     -0.15
## Sample Size
##           BMI SelfRatedHealth
## Extra      424      337
## Agree      424      337
## Con        424      337
## Neur       424      337
## Open       424      337
## SelfRatedHealth 337      337
## BMI        424      337
## Type2Diabetes 336      335
## Healthy    424      337
## Unhealthy  424      337
##           BMI SelfRatedHealth
## Extra      0.21      0.02
## Agree      0.95      0.00
## Con        0.44      0.00
## Neur       0.01      0.00
## Open       0.04      0.02
## SelfRatedHealth 0.00      0.00
## BMI        0.00      0.00
## Type2Diabetes 0.00      0.00
```



```
## Healthy          0.00          0.00
## Unhealthy        0.61          0.00
##
## To see confidence intervals of the correlations, print with the short=FALSE option
```

We extract the results of these analyses and format them, such that correlations significant at  $\alpha < .001$ , are given significance stars.

```
R.zero.r <- as.data.frame(R.zero$r)
R.zero.p <- R.zero$p

for(i in 1:ncol(R.zero.r)){
  R.zero.r[,i] <- as.character(round(R.zero.r[,i], 2))
  R.zero.r[,i] <- ifelse(R.zero.p[,i] < .001,
                        paste(R.zero.r[,i], "*", sep=""),
                        R.zero.r[,i])
}

R.part.r <- as.data.frame(R.part$r)
R.part.p <- R.part$p

for(i in 1:ncol(R.part.r)){
  R.part.r[,i] <- as.character(round(R.part.r[,i], 2))
  R.part.r[,i] <- ifelse(R.part.p[,i] < .001,
                        paste(R.part.r[,i], "*", sep=""),
                        R.part.r[,i])
}

R.all <- as.data.frame(cbind(R.zero.r[, "Healthy"],
                            R.part.r[, "Healthy"],
                            R.zero.r[, "Unhealthy"],
                            R.part.r[, "Unhealthy"],
                            R.zero.r[, health],
                            R.part.r[, health]),
                      row.names = row.names(R.zero.r))
```

We print this formatted table using the stargazer function ([Hlavac, 2018](#))

```

colnames(R.all) <- c(c("Healthy r", "Healthy r_p", "Unhealthy r", "Unhealthy r_p"),
                    paste(health,"r"), paste(health,"r_p"))
colnames(R.all) <-gsub("SelfRatedHealth", "SRH", colnames(R.all))
stargazer(R.all, summary=F,
          title = "Bivariate correlations between personality, diet dimensions and health outcomes",
          out = "bivariate.tex", label="bivariate")

```

|                 | Healthy r | Healthy r_p | Unhealthy r | Unhealthy r_p | SRH r  | BMI r  | Type2Diabetes r | SRH r_p | BMI r_p | Type2Diabetes r_p |
|-----------------|-----------|-------------|-------------|---------------|--------|--------|-----------------|---------|---------|-------------------|
| Extra           | 0.07      | 0.06        | -0.01       | 0             | 0.19*  | 0.01   | 0               | 0.18*   | 0.04    | 0                 |
| Agree           | 0.12      | 0.09        | -0.13       | -0.09         | 0.14   | -0.07  | -0.01           | 0.12    | -0.01   | -0.01             |
| Con             | 0.17*     | 0.16*       | -0.14*      | -0.13*        | 0.23*  | -0.05  | -0.04           | 0.23*   | -0.04   | -0.04             |
| Neur            | -0.16*    | -0.16*      | 0.11        | 0.12          | -0.33* | 0.13   | 0.06            | -0.33*  | 0.15    | 0.06              |
| Open            | 0.2*      | 0.18*       | -0.16*      | -0.14*        | 0.18*  | -0.13  | -0.04           | 0.16*   | -0.1    | -0.04             |
| SelfRatedHealth | 0.24*     | 0.22*       | -0.16*      | -0.14         | 1*     | -0.31* | -0.31*          | 1*      | -0.29*  | -0.31*            |
| BMI             | -0.2*     | -0.18*      | 0.09        | 0.05          | -0.31* | 1*     | 0.38*           | -0.29*  | 1*      | 0.38*             |
| Type2Diabetes   | -0.1      | -0.09       | 0.06        | 0.05          | -0.31* | 0.38*  | 1*              | -0.31*  | 0.38*   | 1*                |

Table 2: Bivariate correlations between personality, diet dimensions and health outcomes

## 6 Moderation by SES

For our final set of analyses, we estimate the degree to which relationships between personality/health outcomes and the diet factors change depending upon socio-economic status.

```
interaction.coef <- data.frame()
n <- 0

low.ses.data <- ori.diet

for(i in c(B5_scores, health, "SES")){
  low.ses.data[,i] <- as.numeric(scale(low.ses.data[,i]))
}

low.ses.data$SES <- low.ses.data$SES + 1

hgh.ses.data <- ori.diet
for(i in c(B5_scores, health, "SES")){
  hgh.ses.data[,i] <- as.numeric(scale(hgh.ses.data[,i]))
}
hgh.ses.data$SES <- hgh.ses.data$SES - 1

for(j in diet)
  {for(i in c(B5_scores, health)){
    n <- n + 1
    if(i != "BMI") cov.used <- cov
    if(i == "BMI") cov.used <- gsub("age_diet","age_clinic",cov)
    equation = paste(c(i,cov.used), collapse = " + ")
    equation <- gsub(i, paste(i, "SES", sep="*"), equation)
    equation <- paste(c(j, equation), collapse = " ~ ")
    equation <- as.formula(equation)
    mod <- lm(equation, data=ori.diet)
    C <- coef(summary(mod))
    interaction <- C[which(grepl(":", rownames(C))), ]
    interaction.coef[n,"Outcome"] <- j
    interaction.coef[n,"Predictor"] <- i
    interaction.coef[n,"Est"] <- interaction["Estimate"]
    interaction.coef[n,"StdError"] <- interaction["Std. Error"]
    interaction.coef[n,"tvalue"] <- interaction["t value"]
    interaction.coef[n,"pvalue"] <- interaction["Pr(>|t|)"]

    low.mod <- lm(equation, data=low.ses.data)
    C.low <- coef(summary(low.mod))
    interaction.coef[n,"low SES r"] <- ifelse(C.low[i, "Pr(>|t|)"] < .01,
                                             paste(round(C.low[i, "Estimate"],2),"*",sep=""),
                                             as.character(round(C.low[i, "Estimate"],2)))

    hgh.mod <- lm(equation, data=hgh.ses.data)
    C.hgh <- coef(summary(hgh.mod))
    interaction.coef[n,"hgh SES r"] <- ifelse(C.hgh[i, "Pr(>|t|)"] < .01,
                                             paste(round(C.hgh[i, "Estimate"],2),"*",sep=""),
                                             as.character(round(C.hgh[i, "Estimate"],2)))
```

```
}
}
```

```
interaction.coef$Est <- ifelse(interaction.coef$pvalue < .01,
                             paste(round(interaction.coef$Est,2), "*", sep=""),
                             as.character(round(interaction.coef$Est, 2)))
```

```
interaction.coef$Predictor <- gsub("Extra","Extraversion", interaction.coef$Predictor)
interaction.coef$Predictor <- gsub("Agree","Agreeableness", interaction.coef$Predictor)
interaction.coef$Predictor <- gsub("Con","Conscientiousness", interaction.coef$Predictor)
interaction.coef$Predictor <- gsub("Neur","Neuroticism", interaction.coef$Predictor)
interaction.coef$Predictor <- gsub("Open","Openness", interaction.coef$Predictor)
interaction.coef$Predictor <- gsub("Type2","Type II ", interaction.coef$Predictor)
interaction.coef$Predictor <- gsub("SelfRatedHealth","Self-Rated Health", interaction.coef$Predictor)
```

```
stargazer(interaction.coef, summary=F, digits = 2, rownames = F,
          title="Interaction of SES with personality and health variables on diet factors", out = "inter")
```

| Outcome   | Predictor         | Est   | StdError | tvalue | pvalue | low SES r | hgh SES r |
|-----------|-------------------|-------|----------|--------|--------|-----------|-----------|
| Healthy   | Extraversion      | 0.01  | 0.04     | 0.25   | 0.80   | 0.01      | 0.04      |
| Healthy   | Agreeableness     | -0.02 | 0.04     | -0.55  | 0.58   | 0.08      | 0.03      |
| Healthy   | Conscientiousness | -0.03 | 0.05     | -0.63  | 0.53   | 0.11      | 0.04      |
| Healthy   | Neuroticism       | 0.03  | 0.05     | 0.57   | 0.57   | -0.12     | -0.06     |
| Healthy   | Openness          | 0.03  | 0.05     | 0.54   | 0.59   | 0.1       | 0.15      |
| Healthy   | Self-Rated Health | -0.01 | 0.04     | -0.28  | 0.78   | 0.19*     | 0.16*     |
| Healthy   | BMI               | 0     | 0.06     | -0.02  | 0.98   | -0.16     | -0.16     |
| Healthy   | Type II Diabetes  | 0.01  | 0.05     | 0.23   | 0.82   | -0.08     | -0.06     |
| Unhealthy | Extraversion      | -0.08 | 0.04     | -1.88  | 0.06   | 0.12      | -0.05     |
| Unhealthy | Agreeableness     | -0.06 | 0.04     | -1.40  | 0.16   | 0.02      | -0.1      |
| Unhealthy | Conscientiousness | -0.07 | 0.05     | -1.35  | 0.18   | 0         | -0.14     |
| Unhealthy | Neuroticism       | 0.11  | 0.05     | 2.41   | 0.02   | -0.05     | 0.17      |
| Unhealthy | Openness          | -0.02 | 0.05     | -0.45  | 0.65   | -0.05     | -0.09     |
| Unhealthy | Self-Rated Health | 0.01  | 0.04     | 0.17   | 0.86   | -0.13     | -0.11     |
| Unhealthy | BMI               | 0     | 0.06     | 0.04   | 0.97   | 0.03      | 0.03      |
| Unhealthy | Type II Diabetes  | -0.01 | 0.05     | -0.19  | 0.85   | 0.05      | 0.03      |

Table 3: Interaction of SES with personality and health variables on diet factors

## 6.1 Plot significant interaction(s)

```
ori.diet$gender <- as.factor(ori.diet$gender)
unhealthy.n <- lm(Unhealthy ~ Neur*SES + age_diet + gender,
                 data=ori.diet)
```

```
plot_model(unhealthy.n,  
  type = "pred",  
  swap.pred = T,  
  terms = c("Neur", "SES"),  
  mdrt.values = "meansd",  
  title="Interaction of neuroticism and SES on eating unhealthy",  
  legend.labels = c("-1SD", "Mean", "+1SD"),  
  axis.title = "Neuroticism")
```

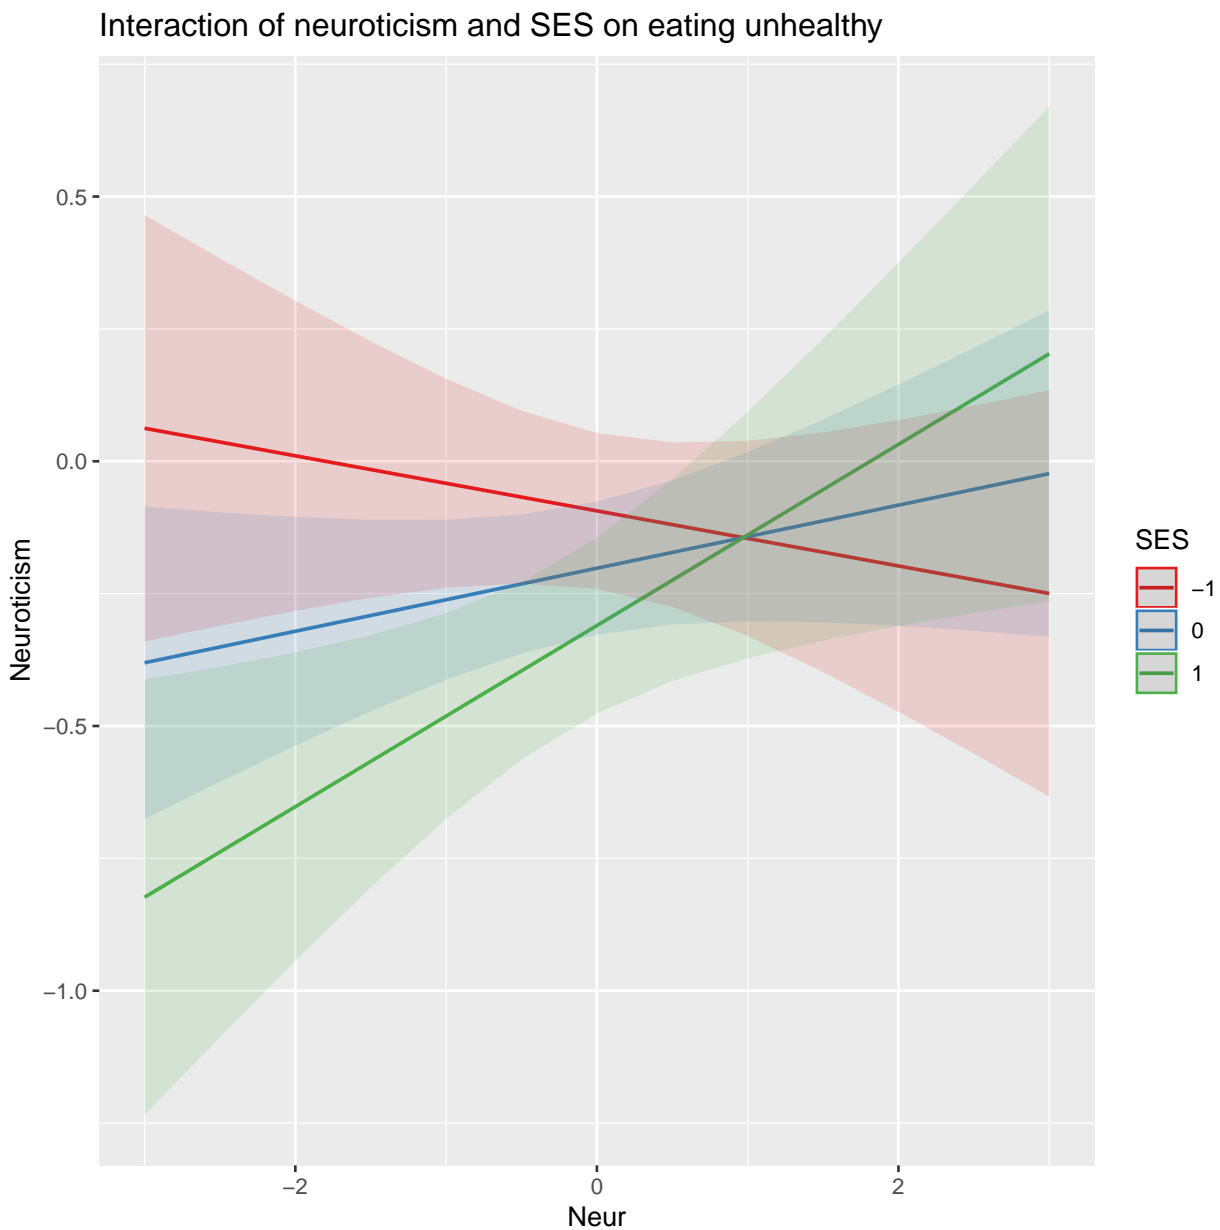

## 7 Sensitivity analyses

We recalculate the interactions with education and maximum income, instead of the socio-economic status composite, as the covariate. We hide the code for the compiled version of this document, to preserve space, but the code is available in the Rnw file.

| Outcome   | Predictor         | Est   | StdError | tvalue | pvalue | low q7maxinc r | hgh q7maxinc r |
|-----------|-------------------|-------|----------|--------|--------|----------------|----------------|
| Healthy   | Extraversion      | 0.04  | 0.04     | 1.02   | 0.31   | -0.02          | 0.07           |
| Healthy   | Agreeableness     | -0.04 | 0.05     | -0.90  | 0.37   | 0.12           | 0.03           |
| Healthy   | Conscientiousness | -0.04 | 0.05     | -0.86  | 0.39   | 0.15*          | 0.06           |
| Healthy   | Neuroticism       | -0.01 | 0.05     | -0.25  | 0.80   | -0.11          | -0.13          |
| Healthy   | Openness          | 0.06  | 0.05     | 1.36   | 0.17   | 0.09           | 0.21***        |
| Healthy   | Self-Rated Health | 0.02  | 0.04     | 0.51   | 0.61   | 0.18**         | 0.23***        |
| Healthy   | BMI               | 0.01  | 0.05     | 0.21   | 0.83   | -0.2**         | -0.18*         |
| Healthy   | Type II Diabetes  | 0.02  | 0.05     | 0.35   | 0.73   | -0.11          | -0.07          |
| Unhealthy | Extraversion      | -0.1* | 0.04     | -2.31  | 0.02   | 0.13*          | -0.06          |
| Unhealthy | Agreeableness     | -0.04 | 0.05     | -0.88  | 0.38   | 0              | -0.09          |
| Unhealthy | Conscientiousness | -0.06 | 0.05     | -1.14  | 0.25   | -0.03          | -0.14*         |
| Unhealthy | Neuroticism       | 0.09* | 0.05     | 1.98   | 0.05   | -0.01          | 0.17*          |
| Unhealthy | Openness          | -0.02 | 0.05     | -0.40  | 0.69   | -0.07          | -0.11          |
| Unhealthy | Self-Rated Health | 0.02  | 0.04     | 0.50   | 0.61   | -0.16*         | -0.12          |
| Unhealthy | BMI               | -0.01 | 0.06     | -0.22  | 0.82   | 0.11           | 0.08           |
| Unhealthy | Type II Diabetes  | 0     | 0.05     | -0.09  | 0.93   | 0.06           | 0.05           |

Table 4: Interaction of q7maxinc with personality and health variables on diet factors

| Outcome   | Predictor         | Est   | StdError | tvalue | pvalue | low highgrd r | hgh highgrd r |
|-----------|-------------------|-------|----------|--------|--------|---------------|---------------|
| Healthy   | Extraversion      | 0.02  | 0.04     | 0.60   | 0.55   | 0.06          | 0.1           |
| Healthy   | Agreeableness     | 0.02  | 0.04     | 0.45   | 0.65   | 0.04          | 0.07          |
| Healthy   | Conscientiousness | -0.01 | 0.04     | -0.20  | 0.84   | 0.13*         | 0.11*         |
| Healthy   | Neuroticism       | 0     | 0.04     | -0.12  | 0.91   | -0.1          | -0.11*        |
| Healthy   | Openness          | 0.04  | 0.04     | 0.97   | 0.33   | 0.07          | 0.15**        |
| Healthy   | Self-Rated Health | -0.02 | 0.04     | -0.55  | 0.58   | 0.19**        | 0.14*         |
| Healthy   | BMI               | -0.03 | 0.04     | -0.63  | 0.53   | -0.1          | -0.15*        |
| Healthy   | Type II Diabetes  | -0.04 | 0.04     | -0.87  | 0.39   | -0.02         | -0.09         |
| Unhealthy | Extraversion      | -0.02 | 0.04     | -0.55  | 0.58   | 0.01          | -0.03         |
| Unhealthy | Agreeableness     | -0.06 | 0.04     | -1.54  | 0.12   | -0.01         | -0.13*        |
| Unhealthy | Conscientiousness | 0.02  | 0.04     | 0.42   | 0.68   | -0.12*        | -0.09         |
| Unhealthy | Neuroticism       | 0.02  | 0.04     | 0.40   | 0.69   | 0.06          | 0.09          |
| Unhealthy | Openness          | 0     | 0.04     | -0.12  | 0.91   | -0.09         | -0.1*         |
| Unhealthy | Self-Rated Health | -0.04 | 0.05     | -0.92  | 0.36   | -0.05         | -0.13*        |
| Unhealthy | BMI               | 0.07  | 0.04     | 1.57   | 0.12   | -0.05         | 0.08          |
| Unhealthy | Type II Diabetes  | 0.01  | 0.04     | 0.23   | 0.82   | 0.02          | 0.04          |

Table 5: Interaction of highgrd with personality and health variables on diet factors

## 8 Additional analysis: Moderation by Gender

As requested during the peer review process, we estimate the degree to which relationships between personality/health outcomes and the diet factors change depending upon gender. We do not include a three-way interaction between gender, SES, and diet, as we believe we are not sufficiently powered.

```
interaction.coef <- data.frame()
n <- 0

for(j in diet)
  {for(i in c(B5_scores, health)){
    n <- n + 1
    if(i != "BMI") cov.used <- cov
    if(i == "BMI") cov.used <- gsub("age_diet","age_clinic",cov)
    equation = paste(c(i,cov.used), collapse = " + ")
    equation <- gsub(i, paste(i, "gender", sep="*"), equation)
    equation <- paste(c(j, equation), collapse = " ~ ")
    equation <- as.formula(equation)
    mod <- lm(equation, data=ori.diet)
    C <- coef(summary(mod))
    interaction <- C[which(grepl(":", rownames(C))), ]
    interaction.coef[n,"Outcome"] <- j
    interaction.coef[n,"Predictor"] <- i
    interaction.coef[n,"Est"] <- interaction["Estimate"]
    interaction.coef[n,"StdError"] <- interaction["Std. Error"]
    interaction.coef[n,"tvalue"] <- interaction["t value"]
    interaction.coef[n,"pvalue"] <- interaction["Pr(>|t|)"]
  }
}

interaction.coef$Est <- ifelse(interaction.coef$pvalue < .01,
                             paste(round(interaction.coef$Est,2), "*", sep=""),
                             as.character(round(interaction.coef$Est, 2)))

interaction.coef$Predictor <- gsub("Extra","Extraversion", interaction.coef$Predictor)
interaction.coef$Predictor <- gsub("Agree","Agreeableness", interaction.coef$Predictor)
interaction.coef$Predictor <- gsub("Con","Conscientiousness", interaction.coef$Predictor)
interaction.coef$Predictor <- gsub("Neur","Neuroticism", interaction.coef$Predictor)
interaction.coef$Predictor <- gsub("Open","Openness", interaction.coef$Predictor)
interaction.coef$Predictor <- gsub("Type2","Type II ", interaction.coef$Predictor)
interaction.coef$Predictor <- gsub("SelfRatedHealth","Self-Rated Health", interaction.coef$Predictor)

stargazer(interaction.coef, summary=F, digits = 2, rownames = F,
          title="Interaction of gender with personality and health variables on diet factors",
          out = "interactions_gender.tex")
```

| Outcome   | Predictor         | Est   | StdError | tvalue | pvalue |
|-----------|-------------------|-------|----------|--------|--------|
| Healthy   | Extraversion      | -0.02 | 0.08     | -0.31  | 0.76   |
| Healthy   | Agreeableness     | -0.04 | 0.08     | -0.56  | 0.57   |
| Healthy   | Conscientiousness | -0.07 | 0.08     | -0.94  | 0.35   |
| Healthy   | Neuroticism       | 0.04  | 0.08     | 0.50   | 0.62   |
| Healthy   | Openness          | -0.01 | 0.08     | -0.16  | 0.87   |
| Healthy   | Self-Rated Health | 0.16  | 0.09     | 1.87   | 0.06   |
| Healthy   | BMI               | -0.01 | 0.10     | -0.13  | 0.90   |
| Healthy   | Type II Diabetes  | 0.05  | 0.09     | 0.62   | 0.54   |
| Unhealthy | Extraversion      | 0     | 0.08     | 0.05   | 0.96   |
| Unhealthy | Agreeableness     | -0.09 | 0.08     | -1.09  | 0.28   |
| Unhealthy | Conscientiousness | -0.03 | 0.08     | -0.42  | 0.67   |
| Unhealthy | Neuroticism       | 0.12  | 0.08     | 1.60   | 0.11   |
| Unhealthy | Openness          | 0     | 0.08     | 0.06   | 0.95   |
| Unhealthy | Self-Rated Health | -0.09 | 0.09     | -1.04  | 0.30   |
| Unhealthy | BMI               | -0.04 | 0.10     | -0.38  | 0.70   |
| Unhealthy | Type II Diabetes  | -0.03 | 0.09     | -0.31  | 0.75   |

Table 6: Interaction of gender with personality and health variables on diet factors

## 9 Food consumption item frequency

For transparency purposes, we report the frequency of responses to each response category on each of the food consumption items.



| question                           | Not at all | 1-3 times in the last month | Once a week | 2-3 times a week | 4-6 times a week | Once a day | 2+ times a day | Total responses |
|------------------------------------|------------|-----------------------------|-------------|------------------|------------------|------------|----------------|-----------------|
| chow mein                          | 151        | 482                         | 63          | 8                | 3                | 0          | 0              | 707             |
| spaghetti w/meat or cream sauce    | 148        | 483                         | 58          | 13               | 3                | 0          | 0              | 705             |
| macaroni,potato..salad w/mayo      | 116        | 441                         | 102         | 42               | 6                | 0          | 1              | 708             |
| hamburgers/cheeseburgers           | 133        | 356                         | 157         | 54               | 3                | 3          | 1              | 707             |
| pizza                              | 118        | 497                         | 77          | 8                | 3                | 2          | 1              | 706             |
| steak/roast                        | 116        | 406                         | 134         | 45               | 3                | 0          | 1              | 705             |
| chicken/fish                       | 7          | 87                          | 166         | 293              | 119              | 18         | 15             | 705             |
| tofu                               | 188        | 312                         | 118         | 64               | 17               | 7          | 1              | 707             |
| spam/ham/luncheon meats            | 161        | 340                         | 119         | 61               | 21               | 3          | 1              | 706             |
| sausage/bacon/hot dogs             | 104        | 380                         | 151         | 63               | 8                | 1          | 0              | 707             |
| french fries                       | 98         | 390                         | 153         | 52               | 8                | 1          | 1              | 703             |
| vegetables                         | 6          | 75                          | 86          | 162              | 144              | 122        | 108            | 703             |
| fruit                              | 22         | 119                         | 112         | 185              | 104              | 108        | 55             | 705             |
| high fiber cereals                 | 257        | 147                         | 78          | 103              | 53               | 61         | 7              | 706             |
| dark whole grain breads            | 219        | 179                         | 68          | 122              | 62               | 45         | 12             | 707             |
| skim/1% fat milk                   | 364        | 98                          | 39          | 51               | 40               | 85         | 28             | 705             |
| 2% fat/whole milk                  | 344        | 136                         | 70          | 61               | 39               | 32         | 16             | 698             |
| butter/margarine/peanut butter     | 53         | 206                         | 138         | 176              | 75               | 42         | 15             | 705             |
| doughnuts/pastry..                 | 77         | 319                         | 154         | 115              | 28               | 12         | 1              | 706             |
| potato/corn chips                  | 90         | 313                         | 168         | 103              | 22               | 8          | 2              | 706             |
| ice cream                          | 181        | 343                         | 100         | 62               | 14               | 7          | 0              | 707             |
| poi                                | 386        | 247                         | 38          | 17               | 11               | 1          | 8              | 708             |
| rice                               | 14         | 48                          | 47          | 111              | 153              | 194        | 139            | 706             |
| mayonnaise/regular salad dressings | 48         | 190                         | 134         | 187              | 89               | 53         | 7              | 708             |

Table 7: Food consumption items and frequency of response endorsement

## Bibliography

- R-stargazerHlavac, M. 2018. stargazer: Well-Formatted Regression and Summary Statistics Tables stargazer: Well-formatted regression and summary statistics tables []. <https://CRAN.R-project.org/package=stargazer> R package version 5.2.2
- R-lsrNavarro, D. 2015. lsr: Companion to "Learning Statistics with R" lsr: Companion to "learning statistics with r" []. <https://CRAN.R-project.org/package=lsr> R package version 0.5
- R-foreignR Core Team. 2018. foreign: Read Data Stored by 'Minitab', 'S', 'SAS', 'SPSS', 'Stata', 'Systat', 'Weka', 'dBase', ... foreign: Read data stored by 'minitab', 's', 'sas', 'spss', 'stata', 'systat', 'weka', 'dbase', ... []. <https://CRAN.R-project.org/package=foreign> R package version 0.8-71
- R-psychRevelle, W. 2019. psych: Procedures for Psychological, Psychometric, and Personality Research psych: Procedures for psychological, psychometric, and personality research []. <https://CRAN.R-project.org/package=psych> R package version 1.8.12
- R-havenWickham, H. Miller, E. 2019. haven: Import and Export 'SPSS', 'Stata' and 'SAS' Files haven: Import and export 'spss', 'stata' and 'sas' files []. <https://CRAN.R-project.org/package=haven> R package version 2.1.0
