# Supplementary material
Source: PubMed Central journal article supplement (PMC7033005)
Supplement: NIHMS1541777-supplement-Supp_2.pdf [file NIHMS1541777-supplement-Supp_2.pdf]

## Diet items in the Hawaii Personality and Health Cohort: Supplementary Tables

---

This file contains supplementary tables which contain information that may be useful to readers. These tables were all created during the analyses and the code which generated these tables is available in Supplementary File 2. Some tables have been manually reformatted in order to ease interpretation; however, all numbers and values were generated from the data.

Table 1 contains the labels of the individual food consumption items and the frequency for which each response choice was endorsed for each item. This sample of participants was used to factor analyze the food consumption variables, although some were missing health and covariate data and were excluded from subsequent analyses.

Table 2 shows the result of the two-factor factor analysis, including factor loadings, the communalities ( $h^2$ ), the uniqueness ( $u^2$ ) and the complexities ( $com$ ) for each item.

Table 3 shows the result of the sensitivity analysis pertaining to the use of the maximum lifetime income as a moderator instead of the SES composite variable.

Table 4 shows the result of the sensitivity analysis pertaining to the use of the education level as a moderator instead of the SES composite variable.

Table 5 shows the result of the additional analyses requested by reviewers examining the use of gender as a moderator.

| question                           | Not at all | 1-3 times in the last month | Once a week | 2-3 times a week | 4-6 times a week | Once a day | 2+ times a day | Total responses |
|------------------------------------|------------|-----------------------------|-------------|------------------|------------------|------------|----------------|-----------------|
| chow mein                          | 151        | 482                         | 63          | 8                | 3                | 0          | 0              | 707             |
| spaghetti w/meat or cream sauce    | 148        | 483                         | 58          | 13               | 3                | 0          | 0              | 705             |
| macaroni,potato..salad w/mayo      | 116        | 441                         | 102         | 42               | 6                | 0          | 1              | 708             |
| hamburgers/cheeseburgers           | 133        | 356                         | 157         | 54               | 3                | 3          | 1              | 707             |
| pizza                              | 118        | 497                         | 77          | 8                | 3                | 2          | 1              | 706             |
| steak/roast                        | 116        | 406                         | 134         | 45               | 3                | 0          | 1              | 705             |
| chicken/fish                       | 7          | 87                          | 166         | 293              | 119              | 18         | 15             | 705             |
| tofu                               | 188        | 312                         | 118         | 64               | 17               | 7          | 1              | 707             |
| spam/ham/luncheon meats            | 161        | 340                         | 119         | 61               | 21               | 3          | 1              | 706             |
| sausage/bacon/hot dogs             | 104        | 380                         | 151         | 63               | 8                | 1          | 0              | 707             |
| french fries                       | 98         | 390                         | 153         | 52               | 8                | 1          | 1              | 703             |
| vegetables                         | 6          | 75                          | 86          | 162              | 144              | 122        | 108            | 703             |
| fruit                              | 22         | 119                         | 112         | 185              | 104              | 108        | 55             | 705             |
| high fiber cereals                 | 257        | 147                         | 78          | 103              | 53               | 61         | 7              | 706             |
| dark whole grain breads            | 219        | 179                         | 68          | 122              | 62               | 45         | 12             | 707             |
| skim/1% fat milk                   | 364        | 98                          | 39          | 51               | 40               | 85         | 28             | 705             |
| 2% fat/whole milk                  | 344        | 136                         | 70          | 61               | 39               | 32         | 16             | 698             |
| butter/margarine/peanut butter     | 53         | 206                         | 138         | 176              | 75               | 42         | 15             | 705             |
| doughnuts/pastry..                 | 77         | 319                         | 154         | 115              | 28               | 12         | 1              | 706             |
| potato/corn chips                  | 90         | 313                         | 168         | 103              | 22               | 8          | 2              | 706             |
| ice cream                          | 181        | 343                         | 100         | 62               | 14               | 7          | 0              | 707             |
| poi                                | 386        | 247                         | 38          | 17               | 11               | 1          | 8              | 708             |
| rice                               | 14         | 48                          | 47          | 111              | 153              | 194        | 139            | 706             |
| mayonnaise/regular salad dressings | 48         | 190                         | 134         | 187              | 89               | 53         | 7              | 708             |

2

Table 1: Food consumption items and frequency of response endorsement

A factor analysis table from the psych package in R

| Variable                           | MR1         | MR2         | h2   | u2   | com  |
|------------------------------------|-------------|-------------|------|------|------|
| HAMBURGERS/CHEESEBURGERS           | <b>0.62</b> | -0.12       | 0.43 | 0.57 | 1.07 |
| FRENCH FRIES                       | <b>0.62</b> | -0.05       | 0.40 | 0.60 | 1.01 |
| SAUSAGE/BACON/HOT DOGS             | <b>0.57</b> | -0.12       | 0.36 | 0.64 | 1.09 |
| DOUGHNUTS/PASTRY..                 | <b>0.53</b> | 0.10        | 0.27 | 0.73 | 1.08 |
| POTATO/CORN CHIPS                  | <b>0.51</b> | 0.06        | 0.25 | 0.75 | 1.03 |
| SPAM/HAM/LUNCHEON MEATS            | <b>0.50</b> | -0.05       | 0.26 | 0.74 | 1.02 |
| STEAK/ROAST                        | <b>0.49</b> | 0.01        | 0.24 | 0.76 | 1.00 |
| ICE CREAM                          | <b>0.48</b> | 0.01        | 0.23 | 0.77 | 1.00 |
| MAYONNAISE/REGULAR SALAD DRESSINGS | <b>0.44</b> | 0.18        | 0.19 | 0.81 | 1.31 |
| BUTTER/MARGARINE/PEANUT BUTTER     | <b>0.42</b> | <b>0.24</b> | 0.20 | 0.80 | 1.59 |
| PIZZA                              | <b>0.35</b> | 0.02        | 0.12 | 0.88 | 1.01 |
| MACARONI,POTATO..SALAD W/MAYO      | <b>0.35</b> | 0.02        | 0.12 | 0.88 | 1.01 |
| SPAGHETTI W/MEAT OR CREAM SAUCE    | <b>0.35</b> | 0.06        | 0.12 | 0.88 | 1.06 |
| CHOW MEIN                          | <b>0.30</b> | -0.11       | 0.11 | 0.89 | 1.25 |
| RICE                               | <b>0.28</b> | -0.04       | 0.09 | 0.91 | 1.04 |
| 2% FAT/WHOLE MILK                  | <b>0.24</b> | 0.07        | 0.06 | 0.94 | 1.15 |
| POI                                | 0.17        | 0.08        | 0.03 | 0.97 | 1.44 |
| FRUIT                              | 0.02        | <b>0.77</b> | 0.59 | 0.41 | 1.00 |
| VEGETABLES                         | 0.01        | <b>0.71</b> | 0.50 | 0.50 | 1.00 |
| HIGH FIBER CEREALS                 | -0.06       | <b>0.58</b> | 0.35 | 0.65 | 1.02 |
| DARK WHOLE GRAIN BREADS            | -0.05       | <b>0.51</b> | 0.27 | 0.73 | 1.02 |
| SKIM/1% FAT MILK                   | -0.20       | <b>0.39</b> | 0.22 | 0.78 | 1.47 |
| CHICKEN/FISH                       | 0.10        | <b>0.26</b> | 0.07 | 0.93 | 1.29 |
| TOFU                               | 0.02        | <b>0.25</b> | 0.06 | 0.94 | 1.01 |
| SS loadings                        | 3.4         | 2.14        |      |      |      |
| Proportion Var                     | 0.14        | 0.09        |      |      |      |
| Cumulative Var                     | 0.14        | 0.23        |      |      |      |
| Cum. factor Var                    | 0.61        | 1           |      |      |      |
| MR1                                | 1.00        | -0.19       |      |      |      |
| MR2                                | -0.19       | 1.00        |      |      |      |

Table 2: Factor analysis of food consumption items

| Predictor                         | $b$    | $SE_b$ | $t$   | $p$  | $r_{Lowincome}$ | $r_{Highincome}$ |
|-----------------------------------|--------|--------|-------|------|-----------------|------------------|
| <i>Healthy food consumption</i>   |        |        |       |      |                 |                  |
| Extraversion                      | 0.04   | 0.04   | 1.02  | 0.31 | -0.02           | 0.07             |
| Agreeableness                     | -0.04  | 0.05   | -0.90 | 0.37 | 0.12            | 0.03             |
| Conscientiousness                 | -0.04  | 0.05   | -0.86 | 0.39 | 0.15*           | 0.06             |
| Neuroticism                       | -0.01  | 0.05   | -0.25 | 0.80 | -0.11           | -0.13            |
| Openness                          | 0.06   | 0.05   | 1.36  | 0.17 | 0.09            | 0.21***          |
| Self-Rated Health                 | 0.02   | 0.04   | 0.51  | 0.61 | 0.18**          | 0.23***          |
| BMI                               | 0.01   | 0.05   | 0.21  | 0.83 | -0.20**         | -0.18*           |
| Type II Diabetes                  | 0.02   | 0.05   | 0.35  | 0.73 | -0.11           | -0.07            |
| <i>Unhealthy food consumption</i> |        |        |       |      |                 |                  |
| Extraversion                      | -0.10* | 0.04   | -2.31 | 0.02 | 0.13*           | -0.06            |
| Agreeableness                     | -0.04  | 0.05   | -0.88 | 0.38 | 0.00            | -0.09            |
| Conscientiousness                 | -0.06  | 0.05   | -1.14 | 0.25 | -0.03           | -0.14*           |
| Neuroticism                       | 0.09*  | 0.05   | 1.98  | 0.05 | -0.01           | 0.17*            |
| Openness                          | -0.02  | 0.05   | -0.40 | 0.69 | -0.07           | -0.11            |
| Self-Rated Health                 | 0.02   | 0.04   | 0.50  | 0.61 | -0.16*          | -0.12            |
| BMI                               | -0.01  | 0.06   | -0.22 | 0.82 | 0.11            | 0.08             |
| Type II Diabetes                  | 0.00   | 0.05   | -0.09 | 0.93 | 0.06            | 0.05             |

Table 3: Interaction of maximum lifetime income with personality and health variables on diet factors

| Predictor                         | $b$   | $SE_b$ | $t$   | $p$  | $r_{LowEDU}$ | $r_{HighEDU}$ |
|-----------------------------------|-------|--------|-------|------|--------------|---------------|
| <i>Healthy food consumption</i>   |       |        |       |      |              |               |
| Extraversion                      | 0.02  | 0.04   | 0.60  | 0.55 | 0.06         | 0.10          |
| Agreeableness                     | 0.02  | 0.04   | 0.45  | 0.65 | 0.04         | 0.07          |
| Conscientiousness                 | -0.01 | 0.04   | -0.20 | 0.84 | 0.13*        | 0.11*         |
| Neuroticism                       | 0.00  | 0.04   | -0.12 | 0.91 | -0.10        | -0.11*        |
| Openness                          | 0.04  | 0.04   | 0.97  | 0.33 | 0.07         | 0.15**        |
| Self-rated Health                 | -0.02 | 0.04   | -0.55 | 0.58 | 0.19**       | 0.14*         |
| BMI                               | -0.03 | 0.04   | -0.63 | 0.53 | -0.10        | -0.15*        |
| Type II Diabetes                  | -0.04 | 0.04   | -0.87 | 0.39 | -0.02        | -0.09         |
| <i>Unhealthy food consumption</i> |       |        |       |      |              |               |
| Extraversion                      | -0.02 | 0.04   | -0.55 | 0.58 | 0.01         | -0.03         |
| Agreeableness                     | -0.06 | 0.04   | -1.54 | 0.12 | -0.01        | -0.13*        |
| Conscientiousness                 | 0.02  | 0.04   | 0.42  | 0.68 | -0.12*       | -0.09         |
| Neuroticism                       | 0.02  | 0.04   | 0.40  | 0.69 | 0.06         | 0.09          |
| Openness                          | 0.00  | 0.04   | -0.12 | 0.91 | -0.09        | -0.10*        |
| Self-rated Health                 | -0.04 | 0.05   | -0.92 | 0.36 | -0.05        | -0.13*        |
| BMI                               | 0.07  | 0.04   | 1.57  | 0.12 | -0.05        | 0.08          |
| Type II Diabetes                  | 0.01  | 0.04   | 0.23  | 0.82 | 0.02         | 0.04          |

Table 4: Interaction of education with personality and health variables on food consumption factors

| Outcome   | Predictor         | Est   | StdError | tvalue | pvalue |
|-----------|-------------------|-------|----------|--------|--------|
| Healthy   | Extraversion      | -0.02 | 0.08     | -0.31  | 0.76   |
| Healthy   | Agreeableness     | -0.04 | 0.08     | -0.56  | 0.57   |
| Healthy   | Conscientiousness | -0.07 | 0.08     | -0.94  | 0.35   |
| Healthy   | Neuroticism       | 0.04  | 0.08     | 0.50   | 0.62   |
| Healthy   | Openness          | -0.01 | 0.08     | -0.16  | 0.87   |
| Healthy   | Self-Rated Health | 0.16  | 0.09     | 1.87   | 0.06   |
| Healthy   | BMI               | -0.01 | 0.10     | -0.13  | 0.90   |
| Healthy   | Type II Diabetes  | 0.05  | 0.09     | 0.62   | 0.54   |
| Unhealthy | Extraversion      | 0.00  | 0.08     | 0.05   | 0.96   |
| Unhealthy | Agreeableness     | -0.09 | 0.08     | -1.09  | 0.28   |
| Unhealthy | Conscientiousness | -0.03 | 0.08     | -0.42  | 0.67   |
| Unhealthy | Neuroticism       | 0.12  | 0.08     | 1.60   | 0.11   |
| Unhealthy | Openness          | 0.00  | 0.08     | 0.06   | 0.95   |
| Unhealthy | Self-Rated Health | -0.09 | 0.09     | -1.04  | 0.30   |
| Unhealthy | BMI               | -0.04 | 0.10     | -0.38  | 0.70   |
| Unhealthy | Type II Diabetes  | -0.03 | 0.09     | -0.31  | 0.75   |

Table 5: Interaction of gender with personality and health variables on diet factors
